# Supplementary material
Source: PubMed Central journal article supplement (PMC4503245)
Supplement: NIHMS674454-supplement-Supplemental_data.pdf [file NIHMS674454-supplement-Supplemental_data.pdf]

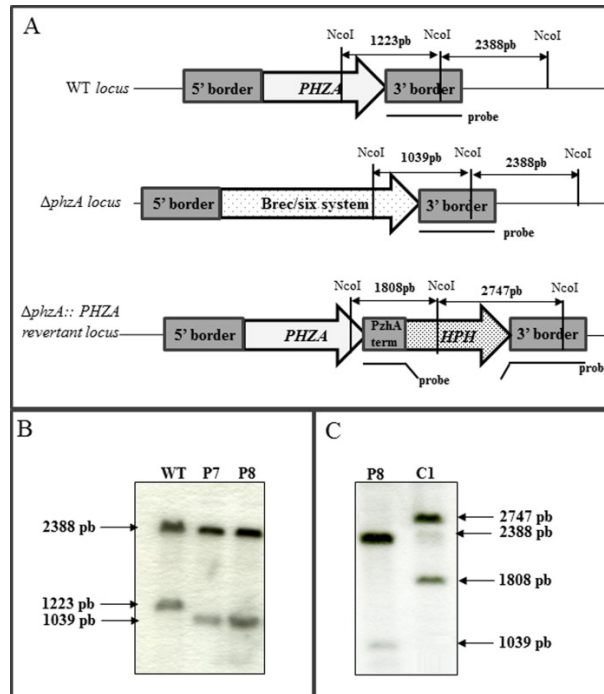

Supplementary Fig. 1 Construction of the  $\Delta phzA$  deletion mutant and  $\Delta phzA :: PHZA$  reconstituted strains by using the self-excising  $\beta$ -rec/six blaster cassette in a  $\Delta akuB$  loc...

Laetitia Muszkieta , Steven de Jesus Carrion , Pauline Robinet , Rémi Beau , Carole Elbim , Eric Pearlman , Jean-P...

**The protein phosphatase PhzA of *A. fumigatus* is involved in oxidative stress tolerance and fungal virulence**

Fungal Genetics and Biology, Volume 66, 2014, 79 - 85

<http://dx.doi.org/10.1016/j.fgb.2014.02.009>

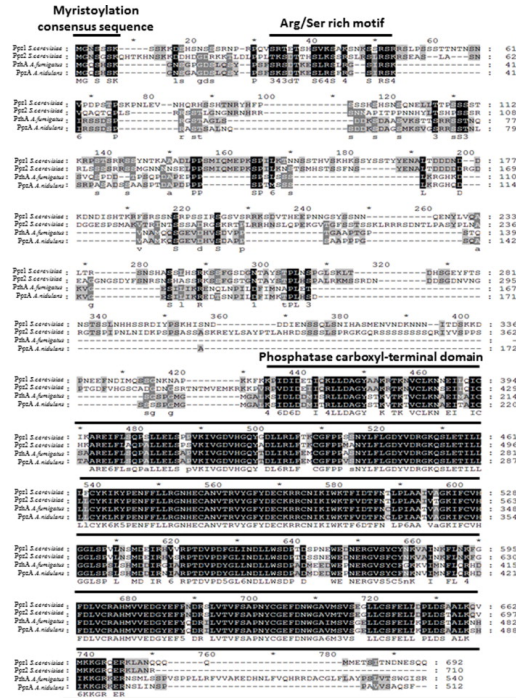

Supplementary Fig. 2 Sequence alignment of the *S. cerevisiae* Pp1/Pp2, *A. nidulans* PpZ, and *A. fumigatus* PhzA proteins. Proteins sequences were aligned by using ClustalW. The cons...

Laetitia Muszkieta , Steven de Jesus Carrion , Pauline Robinet , Rémi Beau , Carole Elbim , Eric Pearlman , Jean-P...

### The protein phosphatase PhzA of *A. fumigatus* is involved in oxidative stress tolerance and fungal virulence

Fungal Genetics and Biology, Volume 66, 2014, 79 - 85

<http://dx.doi.org/10.1016/j.fgb.2014.02.009>

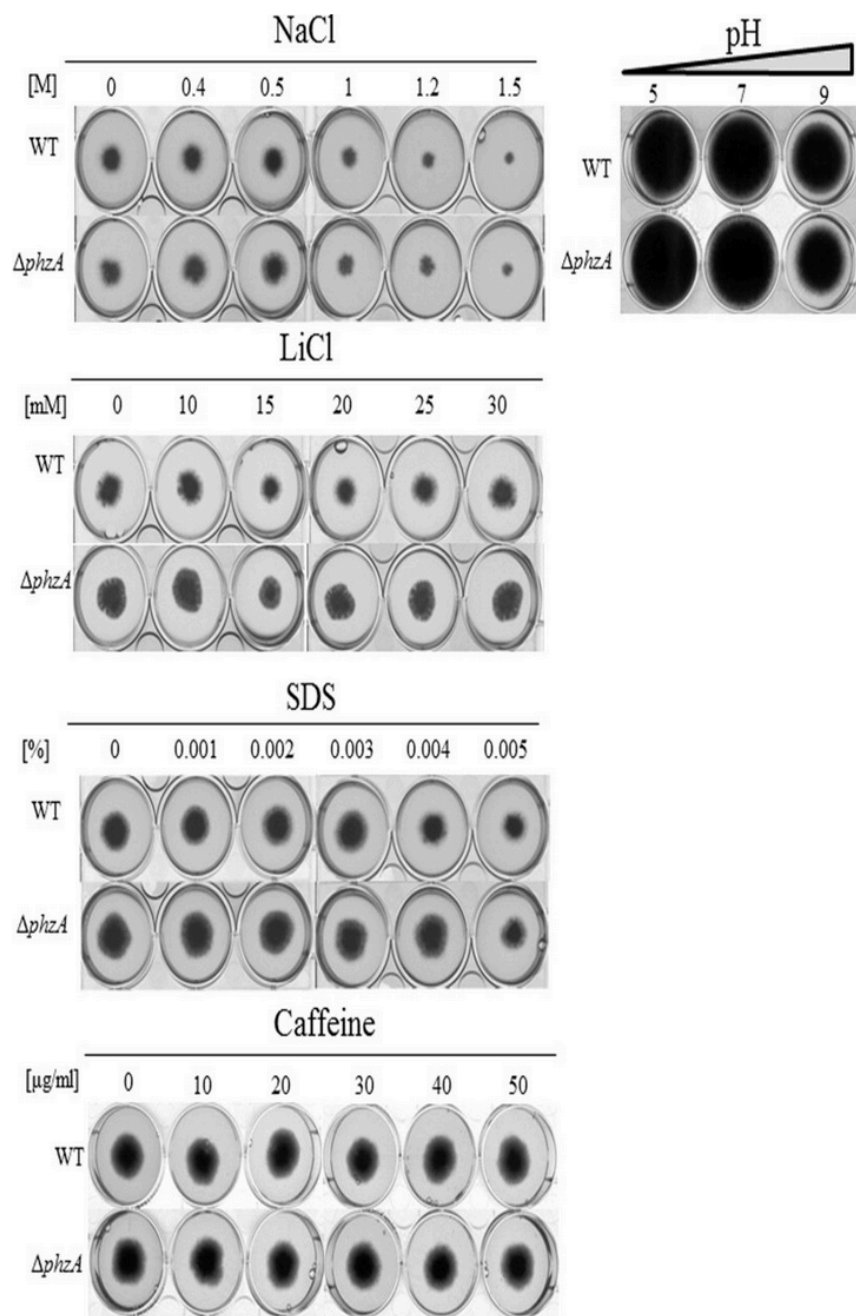

Supplementary Fig. 3.

Sensitivity of the  $\Delta phzA$  mutant strain to osmotic stress, detergent, various pH and caffeine. The sensitivity of  $\Delta phzA$  and the WT strain to NaCl (0.4–1.5 M),  $\text{LiCl}^-$  (10–30 mM), and SDS (0.001–0.005 nM) were observed after 72 h at 37 °C on minimal medium.

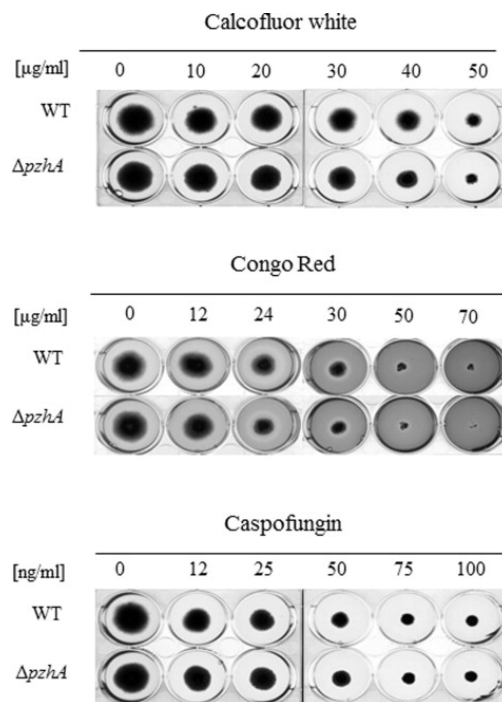

Supplementary Fig. 4 Sensitivity of the  $\Delta phzA$  mutant to cell wall disturbing compounds. The sensibility of the different strains was observed in presence of cell wall disturbing compounds after 72 h at 37 °C.

Laetitia Muszkieta , Steven de Jesus Carrion , Pauline Robinet , Rémi Beau , Carole Elbim , Eric Pearlman , Jean-P...

### The protein phosphatase PhzA of *A. fumigatus* is involved in oxidative stress tolerance and fungal virulence

Fungal Genetics and Biology, Volume 66, 2014, 79 - 85

<http://dx.doi.org/10.1016/j.fgb.2014.02.009>

| <b>NAME</b>      | <b>SEQUENCE 5' → 3'</b>                      | <b>USE</b>                                                 |
|------------------|----------------------------------------------|------------------------------------------------------------|
| For FG phzA      | ACGCCAAGCTTGCATGCCGATATCTACTCAGCCCAGAACGCTGG | Construction of the<br>ppzA deletion<br>cassette           |
| Rev FG phzA      | GGACCTGAGTGATGCTACGAAGTTCTGGGCTCGCG          |                                                            |
| For FD phzA      | TGGTCCATCTAGTGCCTGTTCCACCGATTCATCCG          |                                                            |
| Rev FD phzA      | GTGAATTCGAGCTCGGTACGATATCCAGCCAGTTCCTTCACC   |                                                            |
| For ORF phzA     | GCCAAGCTTGCATGCCACCCGGGTAICTCAGCCCAGAACGCTGG | Construction of the<br>ppzA<br>complementation<br>cassette |
| Rev ORF phzA     | CGGTCTGTTCTCGACTTCCTAACCGCCTAGAATGGATGG      |                                                            |
| For FD phzA      | ACTGCCAGCTTGTGTTCCCTCGCACTATCCCACTTCGT       |                                                            |
| Rev FD phzA      | AATTCGAGCTCGGTACCCCGGAAAGCAGGACTACTGTTGGT    |                                                            |
| For EF1 $\alpha$ | CCATGTGTGTCGAGTCCTTC                         | qRT-PCR primers                                            |
| Rev EF1 $\alpha$ | GAACGTACAGCAACAGTCTGG                        |                                                            |
| For PHZA         | ACCATATCAAGAAGGGCAGGAAA                      |                                                            |
| Rev PHZA         | GCGACCACGAAGCGAAGTAAGG                       |                                                            |
| For HPH          | AGTGTATTGACCGATTCCTTGCG                      |                                                            |
| Rev HPH          | CCTGCCTGAAACCGAAGTGC                         |                                                            |
